# Supplementary material for: PPARγ/NF‐κB and TGF‐β1/Smad pathway are involved in the anti‐fibrotic effects of levo‐tetrahydropalmatine on liver fibrosis
Source: PubMed Central journal article supplement (PMC7875896; doi:10.1111/jcmm.16267), 2021-01-12
Supplement: JCMM-25-1645-s001.pdf [file JCMM-25-1645-s001.pdf]

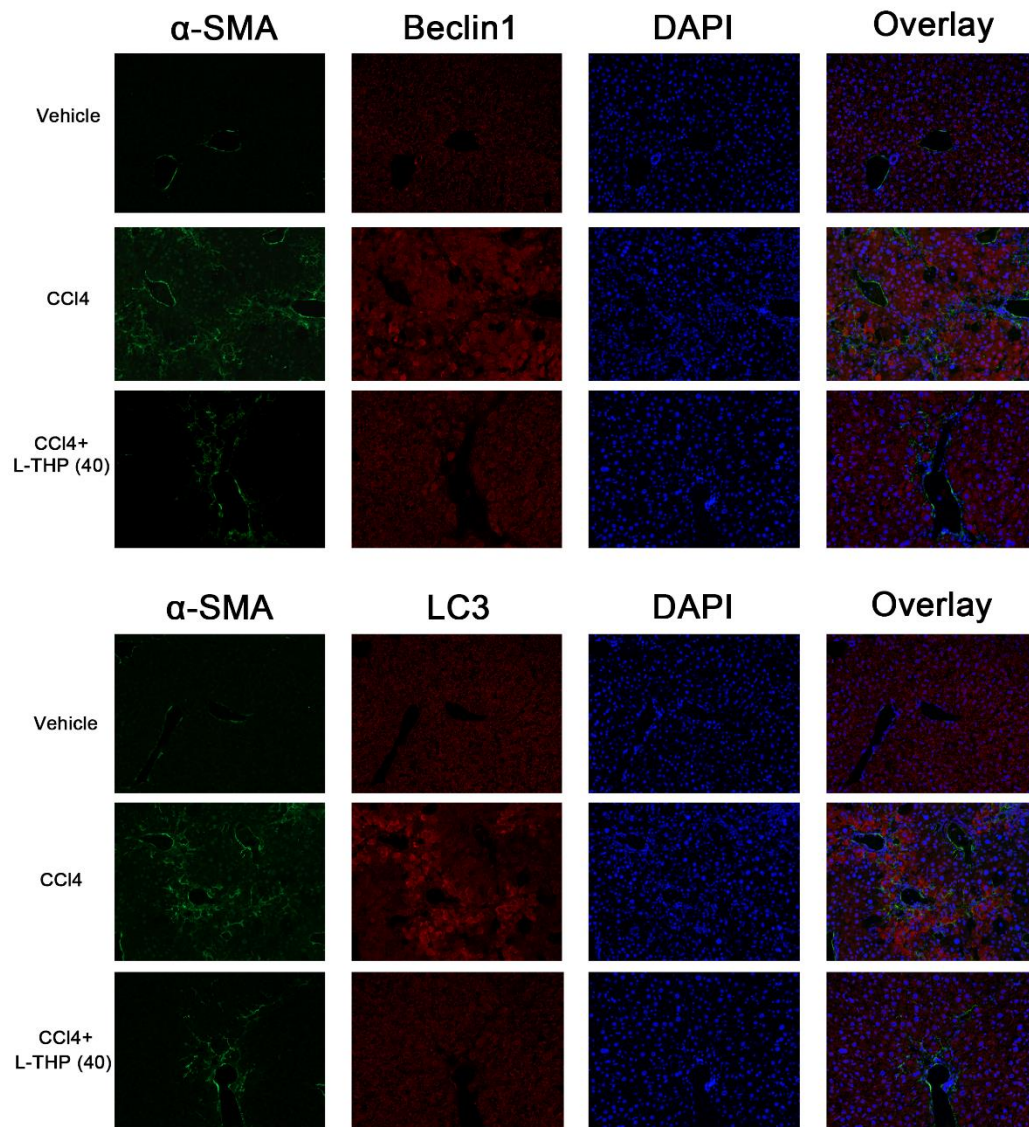

**Figure S1: Representative images of double-immunofluorescence staining of liver sections.**  $\alpha$ -SMA is considered a marker of activated HSCs. 40 mg/kg L-THP suppressed the protein expressions of Beclin1 and LC3 in activated HSCs (original magnification:  $\times 400$ ).
