# Supplementary material for: PPARγ/NF‐κB and TGF‐β1/Smad pathway are involved in the anti‐fibrotic effects of levo‐tetrahydropalmatine on liver fibrosis
Source: PubMed Central journal article supplement (PMC7875896; doi:10.1111/jcmm.16267), 2021-01-12
Supplement: JCMM-25-1645-s002.pdf [file JCMM-25-1645-s002.pdf]

**Supplementary Table 1: Sequences of primers (Human) used for RT-PCR**

| Gene           | DNA strand | Primer sequence (5'-3') |
|----------------|------------|-------------------------|
| $\beta$ -actin | Forward    | CATGTACGTTGCTATCCAGGC   |
|                | Reverse    | CTCCTTAATGTCACGCACGAT   |
| $\alpha$ -SMA  | Forward    | AAAAGACAGCTACGTGGGTGA   |
|                | Reverse    | GCCATGTTCTATCGGGTACTTC  |
| Beclin-1       | Forward    | ACCTCAGCCGAAGACTGAAG    |
|                | Reverse    | AACAGCGTTTGTAGTTCTGACA  |
| LC3            | Forward    | AAGGCGCTTACAGCTCAATG    |
|                | Reverse    | CTGGGAGGCATAGACCATGT    |
| NF- $\kappa$ B | Forward    | GTGGGGACTACGACCTGAATG   |
|                | Reverse    | GGGGCACGATTGTCAAAGATG   |
| PPAR $\gamma$  | Forward    | ACCAAAGTGCAATCAAAGTGGA  |
|                | Reverse    | ATGAGGGAGTTGGAAGGCTCT   |
| TGF- $\beta$ 1 | Forward    | GGCCAGATCCTGTCCAAGC     |
|                | Reverse    | GTGGGTTTCCACCATTAGCAC   |
